# 1 **Rehydration rates and the prevalence of xylem-hydration of**

## 2 **flowers**

3 Adam B. Roddy\* and Craig R. Brodersen

4 School of Forestry & Environmental Studies, Yale University, New Haven, CT, USA

5 \*Corresponding author: [adam.rodny@gmail.com](mailto:adam.rodny@gmail.com)

6

7 Word count:

|    |              |      |
|----|--------------|------|
| 8  | Abstract     | 146  |
| 9  | Introduction | 914  |
| 10 | Methods      | 605  |
| 11 | Results      | 458  |
| 12 | Discussion   | 1175 |
| 13 | References   | 683  |
| 14 | Total        | 3987 |

15

## 16 **Abstract**

17 Angiosperm flowers are remarkably diverse anatomically and morphologically, yet they all  
18 must satisfy the physiological constraints of supplying sufficient amounts of water and  
19 carbon effectively promote pollination. Flowers often occur in the hottest, driest parts of  
20 the plant canopy and can face harsh abiotic conditions. Prior evidence suggests that extant  
21 species vary dramatically in how water is delivered to flowers, with some evidence that  
22 water may be imported into flowers by the phloem. Here we measured midday water  
23 potential gradients between flowers, leaves, and stems of ten phylogenetically diverse  
24 species. We further tested the likelihood of xylem-hydration by measuring rates of  
25 rehydration after experimentally induced desiccation. There was no significant difference  
26 in rehydration rates between leaves and flowers. These results are consistent with xylem-  
27 hydration of flowers and suggest that there has been little modification to the mechanisms  
28 of water transport despite the diversity of floral form.

29

30 Keywords;; flower, angiosperm, xylem, phloem, water relations, hydraulics

31

## 32 Introduction

33 Among the angiosperms reproduction has involved the evolution of complex floral  
34 structures to attract pollinators, increase outcrossing rates, and protect developing seeds.  
35 This critical phase in the life history of a plant can be costly in terms of carbon and water,  
36 but these costs can vary widely [1]. Given that most flowers do not assimilate substantial  
37 amounts of carbon [2] but may still transpire large quantities of water [3–5], floral  
38 transpiration can negatively impact whole plant water balance. Indeed, water lost to floral  
39 transpiration can reduce leaf water potential beyond the threshold that induces stomatal  
40 closure, thereby suppressing carbon gain and further compounding the costs of  
41 reproduction [6–8].

42 Because of the negative effects of floral water loss and the high carbon investment into  
43 building and maintaining flowers, these costs of reproduction may have driven selection  
44 for physiologically cheaper flowers. At a broad phylogenetic scale, floral hydraulic traits  
45 vary substantially among lineages [9]. Compared to ANITA grade and magnoliid flowers,  
46 monocot and eudicot flowers have lower whole-flower hydraulic conductance, minimum  
47 epidermal conductance, and fewer stomata [5]. This trend is in contrast to leaves, which  
48 have evolved traits facilitating higher rates of transpiration [10]. This disparity between  
49 leaf and flower hydraulic architecture suggests that limiting water loss from floral  
50 structures may have been critical in the evolution of their large, morphologically complex  
51 flowers.

52 Furthermore, some evidence suggests that the pathways of water entry into flowers vary  
53 substantially among species. Flowers of some ANITA grade and magnoliid species exhibit

54 water potentials consistent with water delivery by the xylem (i.e. flower water potentials  
55 more negative than stems and leaves) [11,12], but flowers of some eudicots maintain  
56 higher (i.e. less negative) water potentials than leaves. These trends have been used to  
57 suggest that they may be hydraulically isolated from the stem xylem and hydrated instead  
58 by the phloem [13,14]. The difference in water potential between flowers and vegetative  
59 structures can be quite dramatic; petals of cotton plants experiencing drought can maintain  
60 water potentials 3 MPa higher than subtending bracts connected to the stem less than one  
61 centimeter from the petals [13]. How such large water potential gradients are maintained  
62 is unclear, yet may be linked to variation in the pathways of water entry into flowers.

63 The possibility of two fundamentally different mechanisms of delivering water to flowers-  
64 hydration by the xylem versus the phloem-is appealing because of the potential  
65 physiological differences between these two strategies and because of their implications  
66 for floral evolution. Long extinct, early angiosperm flowers are thought to have evolved as  
67 highly modified leaves, consistent with xylem-hydration of basal angiosperm flowers  
68 [11,12]. A transition to phloem-hydration could be beneficial if it helps to buffer flower  
69 water potential from variation in plant water potential. Phloem-hydration could result  
70 from a combination of reduced transpiration rates and xylem dysfunction. Whether the  
71 phloem could supply enough water to maintain turgid, showy flowers given the high  
72 hydraulic resistance of the phloem is unclear. Many flowers have lower stomatal densities  
73 than leaves [5,15,16], which might allow floral transpiration rates during anthesis to be low  
74 enough that water supplied by the phloem and water stored in floral hydraulic capacitors  
75 would be sufficient to meet the demands of transpiration. However, while flowers have  
76 much higher hydraulic capacitance than leaves [14], they also have significantly higher

77 minimum epidermal conductances [17]. Xylem disconnection between the stem and the  
78 flower—due either to discontinuity in the receptacle [18] or to occlusion of the xylem [19]—  
79 could physiologically isolate petals from other floral organs and from the stem xylem,  
80 allowing petal water potential to vary widely and independently of leaf and stem water  
81 potentials.

82 Data supporting this hypothesis, however, are lacking. To date, water potentials have been  
83 measured on flowers of only nine species. Chapotin et al. [14] report water potentials of  
84 flowers and leaves of three tropical trees, but for one species flowers and leaves were  
85 measured on different individual plants, and no measurements of stem water potentials  
86 were made. Inferring directions of water flow from flower and leaf water potentials  
87 without measurements of stems is problematic because flowers may have water potentials  
88 intermediate between stems and leaves, consistent with xylem-hydration. Indeed, this has  
89 been shown in *Illicium* and *Magnolia* flowers, which suggests that these flowers remain  
90 hydraulically connected to the stem xylem [11,12]. Although flowers of *Magnolia*  
91 *grandiflora* generally have lower water potentials than stems, inner whorl tepals maintain  
92 higher water potentials than stems, which is the only example of floral structures  
93 maintaining higher, less negative water potentials than stems [12]. While Trolinder et al.  
94 [13] showed that petals can remain significantly more well hydrated than both bracts and  
95 leaves, water potentials of stems were not reported, making interpretation of their results  
96 difficult.

97 Thus, the lack of water potentials measured simultaneously on stems, leaves, and flowers  
98 hinders our understanding of the potential variation in pathways for water entry into

99 flowers and of floral hydraulic architecture more generally. Here, we report midday water  
100 potentials of flowers, leaves, and stems from ten species spanning most of the extant  
101 phylogenetic diversity of the angiosperms. We also combine measurements under natural  
102 conditions with measurements on slowly desiccating, excised shoots to estimate both the  
103 natural variation of midday flower water potential and the magnitude of water potential  
104 gradients between flowers and stems under extreme drought conditions. Additionally,  
105 these excised shoots were allowed to rehydrate and their water potentials remeasured  
106 after 3-4 hours to determine whether and at what rates flower water potentials can  
107 recover from declines in water content.

## 108 **Methods**

109 Plants growing in the Marsh Botanical Garden (New Haven, CT, USA) and the Arnold  
110 Arboretum of Harvard University (Roslindale, MA, USA) were sampled in the spring and  
111 summer 2017. These included two *Rhododendron* hybrids, one a likely cross between  
112 *Rhododendron catawbiense* and *Rhododendron ponticum* and the other a cultivar in  
113 subgenus *Azaleastrum* that has a double corolla (referred to as *Rhododendron catawbiense*  
114 *x ponticum* and *Rhododendron* subg. *Azaleastrum*, respectively), as well as *Magnolia x*  
115 *loebneri*, which is a cross between *Magnolia kobus* and *Magnolia stellata*. Because of  
116 differences in floral phenology, species were sampled opportunistically as flowers became  
117 available for measurement.

118 In all experiments, samples were sealed into thermocouple psychrometer chambers within  
119 five seconds of excision (Merrill Specialty Equipment, Logan, UT, USA). Within ten minutes  
120 of sampling, chambers were triple-bagged in the laboratory, and submerged in a water

121 bath maintained at 25°C for five to seven hours, at which time sequential water potential  
122 measurements had stabilized. Water potentials of all structures were made using  
123 thermocouple psychrometers interfaced to a CR6 datalogger via an AM16/32B multiplexer  
124 (Campbell Scientific, Logan, UT, USA). Measurements of the microvolt output from the  
125 psychrometers were converted to MPa using sensor-specific calibration curves generated  
126 from measurements of eight NaCl solutions of known water potential [20].

127 Midday water potentials were measured between 1300 and 1500 hrs on each day from at  
128 least three individuals of each species, with the exception of *Clematis montana* var. *rubens*,  
129 for which only one individual was available. In the drydown and rehydration experiments,  
130 flowering shoots were collected in the morning and immediately enclosed in sealed,  
131 humidified plastic bags. After 2-3 hours of equilibration in the plastic bags, initial water  
132 potentials were measured. Flowers and leaves were sampled by excising two 6-mm  
133 diameter discs of each tissue from midway down the length of the leaf, petal, or tepal and  
134 from midway between the midrib and margin, avoiding major veins if possible. The newest,  
135 fully expanded leaves on the same shoot as the flower were chosen. Short (~1 cm length)  
136 stem segments were excised from below the leaves. All samples were enclosed in  
137 thermocouple psychrometer chambers immediately after sampling. In the rehydration  
138 experiment, the cut surface of each shoot was placed in distilled water and the shoot  
139 allowed to rehydrate for 3-4 hours, at which time water potentials of each structure were  
140 resampled. In species with unfused corollas, adjacent tepals or petals of the same flower  
141 were sampled, and for species with fused petals, separate but adjacent flowers were  
142 sampled. Stem samples after rehydration were taken from just below the sampled leaves,  
143 avoiding the approximately 1-cm segment that had been sitting directly in water. This

144 sampling scheme for leaves and flowers assumed that adjacent flowers (or leaves) had the  
145 same water potential.

146 We calculated tissue-specific rehydration rates as:

$$rate = \frac{\Psi_f - \Psi_i}{t}$$

147 where  $\Psi_i$  and  $\Psi_f$  are the water potentials immediately prior to and following rehydration,  
148 respectively, and  $t$  is the time (hours) the sample was allowed to rehydrate. The absolute  
149 rate of water potential recovery depends on the water potential gradient between source  
150 (approximately 0 MPa for pure water) and the tissue water potential,  $\Psi_i$ . The slope of the  
151 relationship between the rehydration rate and  $\Psi_i$  is the intrinsic time constant of  
152 rehydration ( $\tau$ ;  $\text{hr}^{-1}$ ). This time constant was calculated for leaves and flowers of each  
153 species and compared using a paired t-test.

154 Because we are not interested in statistical comparisons of water potentials of the same  
155 structures between species but rather in the water potential differences between  
156 structures within each species, we performed separate mixed-effect ANOVA modeling for  
157 each species. For each model, time of day and structure were treated as fixed effects and  
158 date and individual as random effects. All analyses were performed in R [21]

## 159 **Results**

160 Of the ten species for which there were measurements of midday water potentials, four of  
161 them had flower water potentials more negative than stem water potentials, and four of  
162 them had flower water potentials indistinguishable from stem water potential (Figure 1).



163 Only two species, *Clematis montana* var. *rubens* and *Weigela coraeensis* had flower water  
164 potentials consistently higher (i.e. less negative) than stem water potentials, gradients  
165 which have been used previously to argue for phloem-hydration of flowers.

166 Of the four species that had flower water potentials close to stem water potential, two of  
167 these were precociously flowering species (*Magnolia x loebneri* and *Forsythia* sp.) that  
168 flower early in the spring when vapor pressure deficits are low and before leaves have  
169 flushed. These species may, therefore, not compete with leaves for water. One of these  
170 species, *Calycanthus floridus*, has been shown previously to have whole-flower water  
171 potentials more negative than stems (Roddy et al., in press), suggesting that while the  
172 overall  $\Psi_{\text{stem-flower}}$  gradient may drive water flow towards flowers, there may be intrafloral  
173 variation in water potential gradients between individual tepal whorls.

174 To determine the ranges of water potentials and the rates of rehydration, we allowed  
175 excised flowering shoots to dry on the bench and sampled water potentials periodically  
176 over time (Figure 2a). The driest flowers measured of each species showed signs of  
177 necrosis, having shriveled and begun turning brown. Yet, mean water potentials of flowers  
178 from this experiment never exceeded -1.5 MPa (Figure 2a), and the species with the lowest  
179 mean  $\Psi_{i,\text{flower}}$  were tepals of *Calycanthus floridus*, bracts of *Cornus florida*, and petals of  
180 *Syringa pubescense*. Mean  $\Psi_{i,\text{flower}}$  of other species were all above -1.0 MPa.  $\Psi_{i,\text{leaf}}$  was  
181 generally lower than  $\Psi_{i,\text{flower}}$  for most species.

182 However, mean  $\Delta\Psi_i$  never exceeded 1 MPa, indicating that leaf and flower  $\Psi$  remained very  
183 close to  $\Psi_{\text{stem}}$  even during benchtop dehydration (Figure 2b). In only five of ten species was  
184 mean  $\Delta\Psi_i$  higher than  $\Delta\Psi_{\text{midday}}$  (*Calycanthus floridus*, *Magnolia macrophylla*, *Rhododendron*

185 *catawbiense x ponticum*, *Leucanthemum vulgare*, *Weigela coraeensis*). In two species,  
186 *Clematis montana* and *Rhododendron* subg. *Azaleastrum*, leaves and flowers remained more  
187 well hydrated than stems during dehydration.

188 More useful information on the effects of water potential declines on hydraulic functioning  
189 comes from the rehydration phase of the drydown experiment (Figure 3). For all structures  
190 of all species,  $\Psi_i$  was a strong predictor of rehydration rate; samples allowed to desiccate  
191 longer with lower  $\Psi_i$  had faster rates of water potential recovery. There was little variation  
192 among species and structures in the relationship between  $\Psi_i$  and rehydration rate. To  
193 quantify this relationship, we calculated the slope,  $\tau$ , which is the intrinsic time constant of  
194 rehydration.  $\tau$  did not differ significantly among leaves and flowers ( $t = 1.64$ ,  $df = 9$ ,  $P =$   
195  $0.14$ ; Figure 4).

## 196 **Discussion**

197 In contrast to previous reports, water potential gradients between flowers and stems  
198 suggest that flowers of many species remain hydraulically connected to the stem xylem  
199 during anthesis. Results from the rehydration experiment further corroborate this result.  
200 Together these experiments help to clarify the dynamics of water potential gradients in  
201 flowering shoots under natural conditions and during experimental desiccation and  
202 rehydration cycles.

203 The direction of water potential gradients between stems and flowers has been  
204 surprisingly unclear, with some reports suggesting that flowers may not be hydraulically  
205 connected to the stem xylem during anthesis. Reports of flowers having higher water

206 potentials than leaves have been used to suggest that flowers may be hydrated by the  
207 phloem [13,14], while other reports have shown that water potentials of flowers are more  
208 negative than stems, suggesting that flowers remain hydrated by the stem xylem during  
209 anthesis [11,12]. While a single transition from xylem- to phloem-hydration is not  
210 necessarily expected, the apparently strong phylogenetic signal in the pathways of water  
211 entry to flowers is reinforced by similarly strong phylogenetic signal in other floral  
212 hydraulic traits [5]. Our data strongly suggest that most flowers—even those of eudicots,  
213 which are purported to be phloem-hydrated—may remain hydraulically connected to the  
214 stem xylem. Indeed,  $\Delta\Psi_{\text{stem-flower}}$  is often in the same direction as  $\Delta\Psi_{\text{stem-leaf}}$  though the  
215 magnitude of  $\Delta\Psi_{\text{stem-flower}}$  is lower (Figure 1). Therefore, previous data used to show  
216 phloem-hydration of flowers are consistent with our results for xylem-hydrated flowers.  
217 However, among some species, it is certainly possible that  $\Delta\Psi_{\text{stem-flower}}$  may be negative,  
218 which would allow water to flow from the flower to the stem. This occurred among two  
219 magnoliids (*Calycanthus floridus*, *Magnolia macrophylla* var. *ashei*), the basal eudicot  
220 (*Clematis montana*), and one of the eudicots (*Weigela coraeensis*). Even with these reverse  
221 water potential gradients, how much water may flow from flowers to stems depends upon  
222 the resistance in the hydraulic pathway. In this case, flowers may actually supply water to  
223 the stem, as do some fruits [22]. Although the relative contributions of the various  
224 resistances in the hydraulic pathway into and through flowers have not yet been  
225 quantified, measurements of whole-flower hydraulic conductance suggest that the  
226 hydraulic resistances can be high, but not substantially higher than in leaves [5].

227 The midday water potential gradients reported here also suggest that flower hydraulic  
228 architecture may differ between species that flower before or after leaf out. Two of the  
229 species measured here were precociously flowering, producing flowers prior to leaf flush  
230 (*Magnolia x loebneri* and *Forsythia* sp.). Flowers of both of these species had water  
231 potentials equal to  $\Psi_{\text{stem}}$  (Figure 1). Without the need to compete for water with co-  
232 occurring leaves,  $\Psi_{\text{flower}}$  in these species may not need to decline much below  $\Psi_{\text{stem}}$  in order  
233 to drive water flow into the flower. Although precocious flowering has been hypothesized  
234 as a way to eliminate competition for water between flowers and leaves, even leaves on the  
235 same branch may not compete with each other for water [23], suggesting that there may be  
236 little or no competition for water between leaves and flowers. The hydraulic architecture of  
237 precocious flowers may differ in other ways from flowers that co-occur with leaves. For  
238 example, precocious flowers appear earlier in spring, when atmospheric conditions are  
239 cooler and more humid, which limits their transpiration rates [24]. Furthermore, in ring-  
240 porous species current-year vessels in the stem bole are mature only once leaves are  
241 mature [25], suggesting that the water used by precocious flowers may be provided by  
242 localized stem water storage.

243 The water potential gradients reported also aid in interpreting the role of embolism  
244 formation and spread in flowers. Zhang and Brodribb [26] recently reported that water  
245 potentials at 50% loss of xylem function in flowers of four species ranged from -2 to -4  
246 MPa, while leaves of the same species ranged from about -1.5 to -7 MPa. The extent to  
247 which embolism may influence flower function, phenology, and floral longevity is unclear.  
248 Recent evidence suggests that *Calycanthus floridus* flowers rarely encounter water  
249 potentials low enough to induce embolism under natural conditions (Roddy et al., in press).

250 Here, we show the lowest midday  $\Psi_{\text{flower}}$  measured was -1.63 MPa in an outer tepal of  
251 *Magnolia acuminata* var. *subcordata*. Thus, it is unlikely that the flowers measured in the  
252 present study experienced embolism at midday. Even when shoots had been excised and  
253 allowed to desiccate,  $\Psi_{\text{flower}}$  of almost all species remained higher than -2 MPa. Only petals  
254 of *Rhododendron catawbiense* x *ponticum* displayed water potentials substantially below -2  
255 MPa, and these petals did not rehydrate, suggesting that there may have been embolism-  
256 induced hydraulic failure or other structural damage to outside-xylem pathways that  
257 prevented rehydration. While water loss and the threat of desiccation impact floral display  
258 [6–8], our results suggest that under natural conditions, flowers rarely encounter  
259 embolism.

260 Flowers and leaves differed little in their rates of rehydration. While leaf water potentials  
261 tended to decline more than flowers during the desiccation experiment, leaves and flowers  
262 followed similar rehydration trajectories with no difference in their intrinsic rates of  
263 rehydration (Figures 3, 4). With the exception of one *Rhododendron* species, flowers  
264 rehydrated just as quickly as leaves for a given initial water potential, suggesting that their  
265 lower vein densities and hydraulic conductances did not hinder their capacity to recover  
266 from desiccation-induced water potential declines. In contrast to the other species,  
267 rehydration rates of *Rhododendron catawbiense* x *ponticum* petals did not follow the same  
268 trajectory as leaves or flowers of other species when the initial water potential was below  
269 approximately -1 MPa (Figure 3d). Between 0 and -1 MPa, however, this species showed  
270 rehydration patterns consistent with the other species studied, suggesting that they may  
271 have suffered failure in the hydraulic pathway. Importantly, though, while the rate of water  
272 potential recovery did not differ among flowers and leaves (Figure 4), because flower

273 water potentials did not decline as much as leaves, the absolute change in water potential  
274 was less in flowers.

275 Under natural conditions, water potentials of flowers during anthesis deviate little from  
276 stem water potentials, with  $\Delta\Psi_{\text{stem-flower}}$  rarely exceeding 0.5 MPa, and only in some species  
277 were reverse water potential gradients observed (Figure 1). While these  $\Psi$  gradients  
278 cannot unequivocally determine whether flowers are hydrated by the xylem or by the  
279 phloem, the prevalence of positive  $\Delta\Psi_{\text{stem-flower}}$  among species is consistent with xylem-  
280 hydration of flowers, even among the eudicots. Given that flowers lose turgor at higher  
281 water potentials than leaves [12], minimizing  $\Delta\Psi_{\text{stem-flower}}$  may be critical to preventing  
282 turgor loss. Furthermore, these results suggest that flowers can rehydrate as rapidly as  
283 leaves. Unlike leaves, however, which must remain turgid to continue assimilating carbon,  
284 it is possible that wilted flowers may still attract pollinators as long as ovary water  
285 potentials remain high. Although the pathways for water movement into flowers remain  
286 unclear, our measurements of midday water potentials and of rehydration dynamics do not  
287 rule out the possibility of xylem hydration. Indeed, xylem hydration of flowers is certainly  
288 possible, and the apparent dichotomy between xylem-hydration of basal angiosperm  
289 flowers and phloem-hydration of eudicot flowers may very well be spurious.

## 290 **Acknowledgments**

291 K. Richardson, M. Dosmann, and F. Rosin provided access and support at the Arnold  
292 Arboretum. Funding was provided by the Arnold Arboretum of Harvard University and the  
293 Yale Institute for Biospheric Studies.



## 295 **References**

- 296 1. Bazzaz FA, Chiariello NR, Coley P, Pitelka LF. 1987 Allocating resources to reproduction  
297 and defense. *BioScience* **37**, 58–67.
- 298 2. Galen C, Dawson TE, Stanton ML. 1993 Carpels and leaves: Meeting the carbon cost of  
299 reproduction in an alpine buttercup. *Oecologia* **95**, 187–193.
- 300 3. Roddy AB, Dawson TE. 2012 Determining the water dynamics of flowering using  
301 miniature sap flow sensors. *Acta Horticulturae* **951**, 47–54.
- 302 4. Teixido AL, Valladares F. 2014 Disproportionate carbon and water maintenance costs of  
303 large corollas in hot mediterranean ecosystems. *Perspectives in Plant Ecology, Evolution and*  
304 *Systematics* **16**, 83–92.
- 305 5. Roddy AB, Brodersen CR, Dawson TE. 2016 Hydraulic conductance and the maintenance  
306 of water balance in flowers. *Plant, Cell & Environment* **39**, 2123–2132.  
307 (doi:10.1111/pce.12761)
- 308 6. Galen C, Sherry RA, Carroll AB. 1999 Are flowers physiological sinks or faucets? Costs  
309 and correlates of water use by flowers of *polemonium viscosum*. *Oecologia* **118**, 461–470.
- 310 7. Lambrecht SC, Dawson TE. 2007 Correlated variation of floral and leaf traits along a  
311 moisture availability gradient. *Oecologia* **151**, 574–583. (doi:10.1007/s00442-006-0617-7)
- 312 8. Lambrecht SC. 2013 Floral water costs and size variation in the highly selfing  
313 leptosiphon bicolor (polemoniaceae). *International Journal of Plant Sciences* **174**, 74–84.  
314 (doi:10.1086/668230)



- 315 9. Roddy AB, Williams CM, Lilitham T, Farmer J, Wormser V, Pham T, Fine PVA, Feild TS,  
316 Dawson TE. 2013 Uncorrelated evolution of leaf and petal venation patterns across the  
317 angiosperm phylogeny. *Journal of Experimental Botany* **64**, 4081–4088.  
318 (doi:10.1093/jxb/ert247)
- 319 10. Simonin KA, Roddy AB. 2018 Genome downsizing, physiological novelty, and the global  
320 dominance of flowering plants. *PLoS Biology* **16**, e2003706.
- 321 11. Feild TS, Chatelet DS, Brodribb TJ. 2009 Ancestral xerophobia: A hypothesis on the  
322 whole plant ecophysiology of early angiosperms. *Geobiology* **7**, 237–264.  
323 (doi:10.1111/j.1472-4669.2009.00189.x)
- 324 12. Feild TS, Chatelet DS, Brodribb TJ. 2009 Giant flowers of southern magnolia are  
325 hydrated by the xylem. *Plant Physiology* **150**, 1587–1597. (doi:10.1104/pp.109.136127)
- 326 13. Trolinder N, McMichael B, Upchurch D. 1993 Water relations of cotton flower petals and  
327 fruit. *Plant, Cell & Environment* **16**, 755–760.
- 328 14. Chapotin SM, Holbrook NM, Morse S, Gutiérrez MV. 2003 Water relations of tropical dry  
329 forest flowers: Pathways for water entry and the role of extracellular polysaccharides.  
330 *Plant, Cell & Environment* **26**, 623–630.
- 331 15. Hew CS, Lee GL, Wong SC. 1980 Occurrence of non-functional stomata in the flowers of  
332 tropical orchids. *Annals of Botany* **46**, 195–201.
- 333 16. Lipayeva LI. 1989 On the anatomy of petals in angiosperms. *Botanicheskii Zhurnal* **74**,  
334 9–18.

- 335 17. Roddy AB. 2015 A physiological approach to the ecology and evolution of flowers.
- 336 18. Lersten NR, Wemple DK. 1966 The discontinuity plate, a definitive floral characteristic  
337 of the psoraleae (leguminosae). *American Journal of Botany* **53**, 548–555.
- 338 19. Knipfer T, Fei J, Gambetta GA, McElrone AJ, Shackel KA, Matthews MA. 2015 Water  
339 transport properties of the grape pedicel during fruit development: Insights into xylem  
340 anatomy and function using microtomography. *Plant Physiology* **168**, 1590–1602.  
341 (doi:10.1104/pp.15.00031)
- 342 20. Brown RW, Bartos DL. 1982 A calibration model for screen-caged peltier thermocouple  
343 psychrometers.
- 344 21. Team RC. 2017 *R: A language and environment for statistical computing*. Vienna, Austria:  
345 R Foundation for Statistical Computing. See <https://www.R-project.org/>.
- 346 22. Higuchi H, Sakuratani T. 2006 Dynamics in mango (*mangifera indica* l.) fruit during the  
347 young and mature fruit seasons as measured by the stem heat balance method. *Journal of*  
348 *the Japanese Society for Horticultural Science* **75**, 11–19.
- 349 23. Brooks JR, Schulte PJ, Bond BJ, Coulombe R, Domec JC, Hinckley TM, McDowell N,  
350 Phillips N. 2003 Does foliage on the same branch compete for the same water? Experiments  
351 on douglas-fir trees. *Trees-Structure and Function* **17**, 101–108.
- 352 24. Liu H, Xu Q-Y, Lundgren MR, Ye Q. 2017 Different water relations between flowering  
353 and leaf periods: A case study in flower-before-leaf-emergence magnolia species.  
354 *Functional Plant Biology* **44**, 1098–1110.

355 25. Kitin P, Funada R. 2016 Earlywood vessels in ring-porous trees become functional for  
356 water transport after bud burst and before the maturation of the current-year leaves. *IAWA*  
357 *Journal* **37**, 315–331.

358 26. Zhang F-P, Brodribb TJ. 2017 Are flowers vulnerable to xylem cavitation during  
359 drought? *Proceedings of the Royal Society B: Biological Sciences* **284**, 20162642.

360

361

362 Figure legends

363

364 Figure 1. Midday water potential gradients ( $\Delta\Psi_{\text{stem-leaf}}$  or  $\Delta\Psi_{\text{stem-flower}}$ ) for ten species  
365 measured under natural conditions. Different floral structures are differentiated by  
366 different symbols. The grey, horizontal line represents the condition when  $\Psi$  of the  
367 structure is equivalent to  $\Psi_{\text{stem}}$  (i.e.  $\Delta\Psi = 0$  MPa). Positive values indicate that leaf or floral  
368 structures have  $\Psi$  lower than stems and negative values indicate that leaf or floral  
369 structures have  $\Psi$  higher than stems. Shading indicates presumed hydration pathway  
370 based on water potential gradients (blue: xylem-hydrated; green: phloem-hydrated;  
371 yellow: equivocal). Points and error bars represent mean  $\pm$  s.e.

372

373 Figure 2. (a) Leaf and flower water potentials and (b) stem-leaf and stem-flower water  
374 potential gradients after bench drying and prior to rehydration. The dashed, horizontal  
375 line represents the condition when  $\Psi$  of the structure is equivalent to  $\Psi_{\text{stem}}$  (i.e.  $\Delta\Psi = 0$   
376 MPa). Points and error bars represent mean  $\pm$  s.e.

377

378 Figure 3. Rehydration rates of leaves, flowers, and stems as a function of initial water  
379 potential for (a) *Clematis montana* var. *rubens*, (b) *Leucanthemum vulgare*, (c) *Magnolia*  
380 *macrophylla* var. *ashei*, and (d) *Rhododendron catawbiense* x *ponticum*., with data for all  
381 species in lighter colors. Species-specific regression lines for leaves and flowers are shown.

382 In (d), the solid line for flowers represents only points with initial water potentials greater  
383 than -1 MPa, while the dashed line represents all flowers of this species.

384

385 Figure 4. The time constant of rehydration ( $\tau$ , the slope of rehydration rate versus water  
386 potential as shown in Figure 3) did not differ between leaves and flowers.

387

Figure 1. Midday water potential gradients ( $\Delta\Psi_{\text{stem-leaf}}$  or  $\Delta\Psi_{\text{stem-flower}}$ ) for ten species measured under natural conditions. Different floral structures are differentiated by different symbols. The grey, horizontal line represents the condition when  $\Psi$  of the structure is equivalent to  $\Psi_{\text{stem}}$  (i.e.  $\Delta\Psi = 0$  MPa). Positive values indicate that leaf or floral structures have  $\Psi$  lower than stems and negative values indicate that leaf or floral structures have  $\Psi$  higher than stems. Shading indicates presumed hydration pathway based on water potential gradients (blue: xylem-hydrated; green: phloem-hydrated; yellow: equivocal). Points and error bars represent mean  $\pm$  s.e.

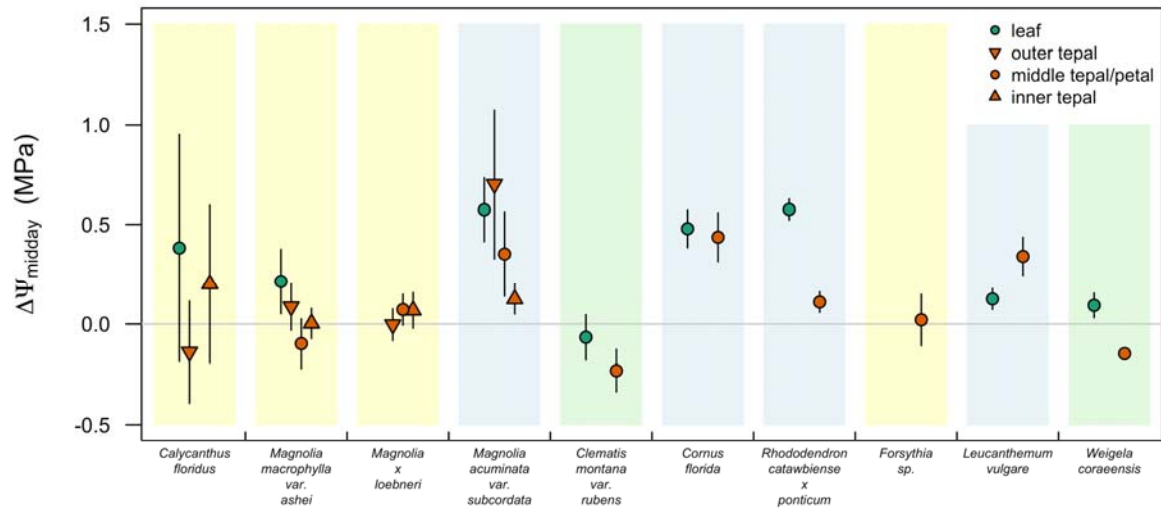

Figure 2. (a) Leaf and flower water potentials and (b) stem-leaf and stem-flower water potential gradients after bench drying and prior to rehydration. The dashed, horizontal line represents the condition when  $\Psi$  of the structure is equivalent to  $\Psi_{\text{stem}}$  (i.e.  $\Delta\Psi = 0$  MPa). Points and error bars represent mean  $\pm$  s.e.

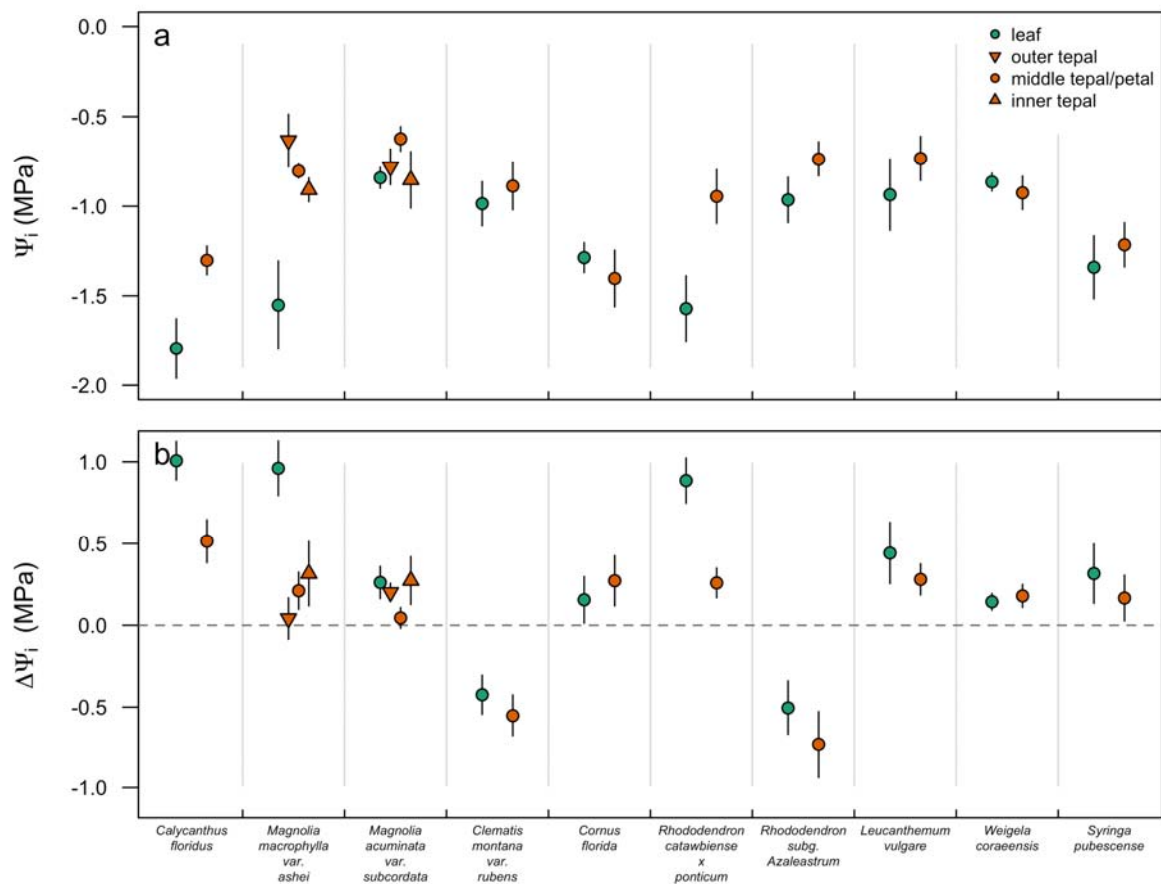

Figure 3. Rehydration rates of leaves, flowers, and stems as a function of initial water potential for (a) *Clematis montana* var. *rubens*, (b) *Leucanthemum vulgare*, (c) *Magnolia macrophylla* var. *ashei*, and (d) *Rhododendron catawbiense* x *ponticum*., with data for all species in lighter colors. Species-specific regression lines for leaves and flowers are shown. In (d), the solid line for flowers represents only points with initial water potentials greater than -1 MPa, while the dashed line represents all flowers of this species.

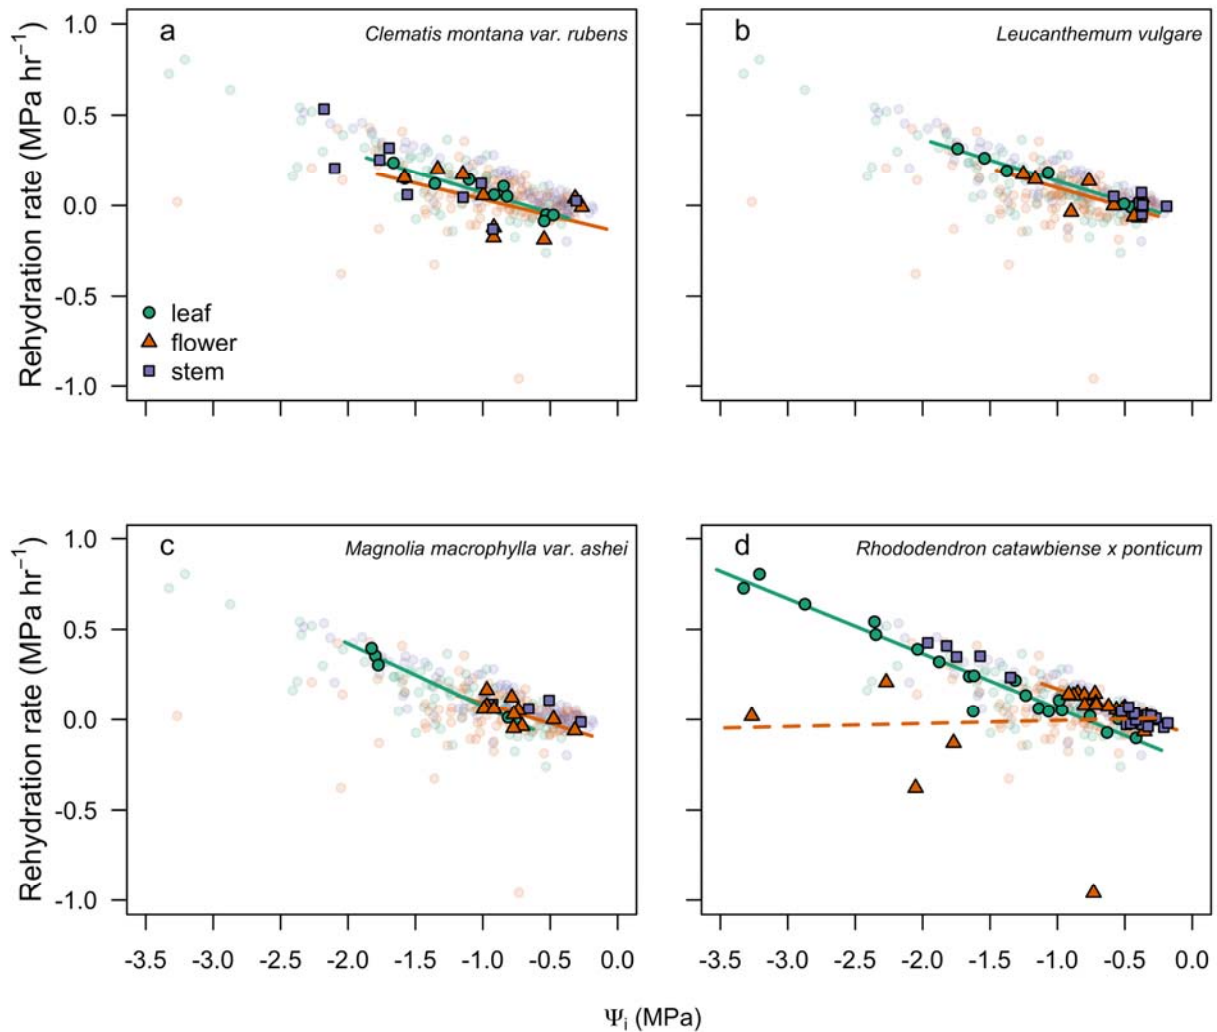



Figure 4. The time constant of rehydration ( $\tau$ , the slope of rehydration rate versus water potential as shown in Figure 3) did not differ between leaves and flowers.

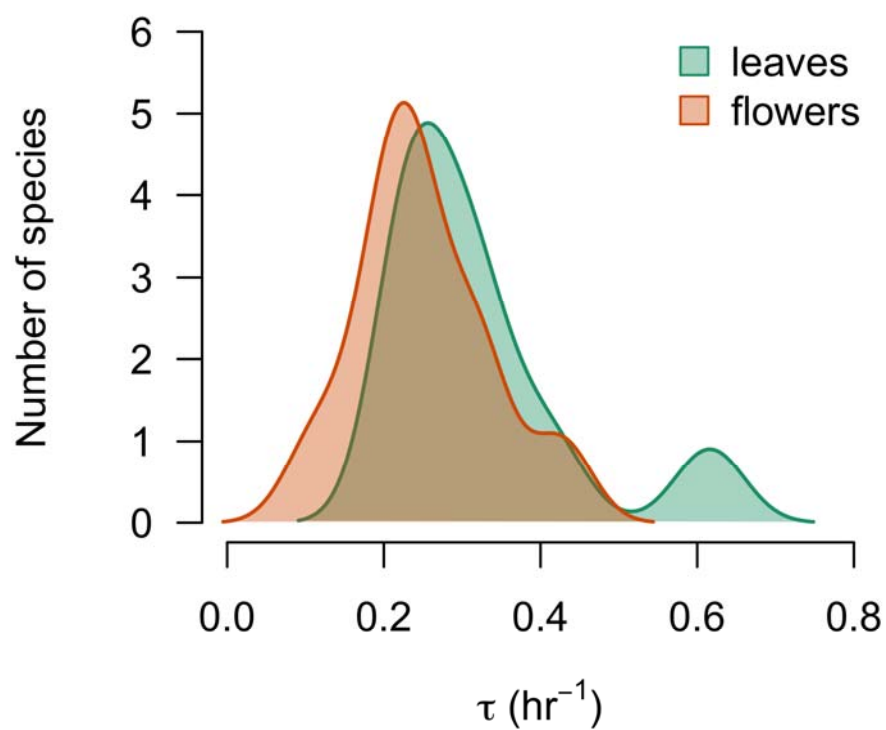

Source: https://www.biorxiv.org/content/10.1101/255042v1.full.pdf
